# Supplementary material for: The Relevance of Physico-Chemical Properties and Protein Corona for Evaluation of Nanoparticles Immunotoxicity—In Vitro Correlation Analysis on THP-1 Macrophages
Source: MDPI journal article supplement (doi:10.3390/ijms23116197), 2022-05-31
Supplement: s1 [file s1]

## Supplementary material

### TITLE: The Relevance of Physico-Chemical Properties and Protein Corona for Evaluation of Nanoparticles Immunotoxicity—In Vitro Correlation Analysis on THP-1 Macrophages

Mojca Pavlin <sup>1,2,\*†</sup>, Jasna Lojk <sup>2,†</sup>, Klemen Strojjan <sup>2</sup>, Iva Hafner-Bratkovič <sup>3,4</sup>, Roman Jerala <sup>3,4</sup>, Adrijana Leonardi <sup>5</sup>, Igor Križaj <sup>5</sup>, Nataša Drnovšek <sup>6</sup>, Saša Novak <sup>6</sup>, Peter Veranič <sup>7</sup> and Vladimir Boštjan Bregar <sup>2</sup>

\*Corresponding author [mojca.pavlin@mf.uni-lj.si](mailto:mojca.pavlin@mf.uni-lj.si)

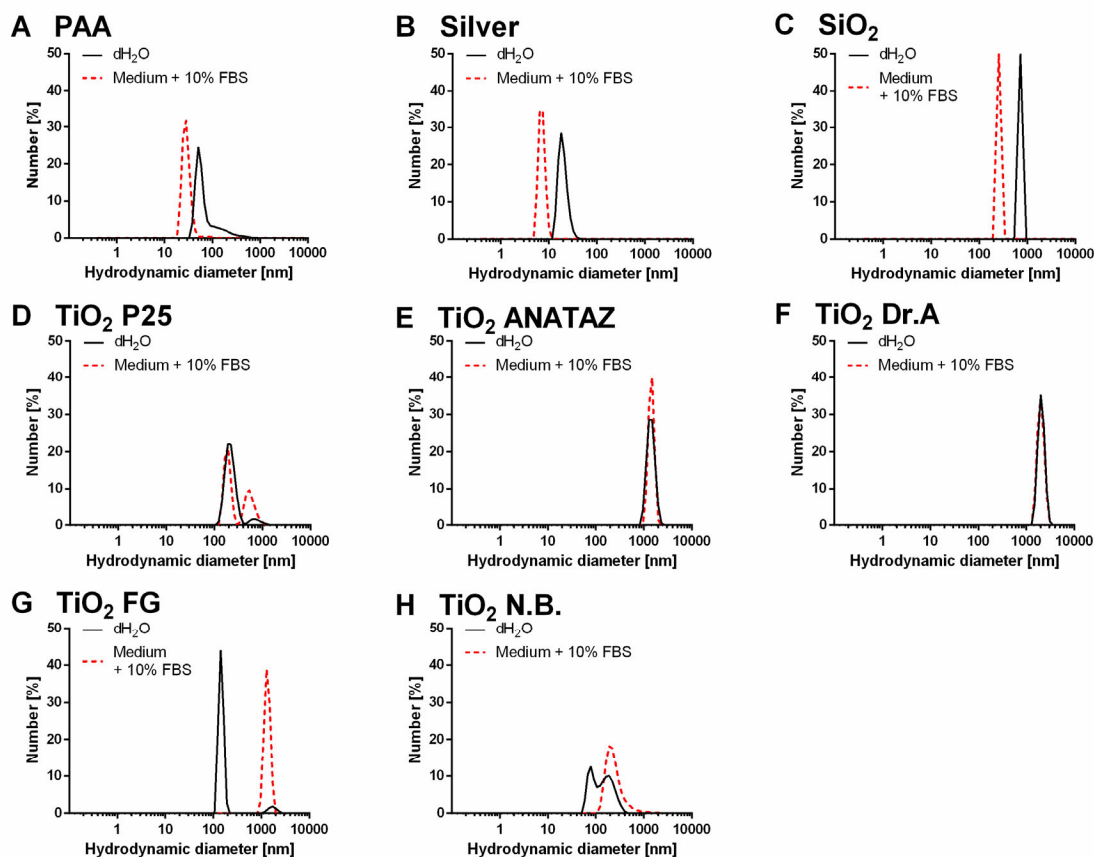

Figure S1: Size distribution by number (hydrodynamic diameter) of NPs measured by DLS in water and in complete RPMI media with 10% FBS.

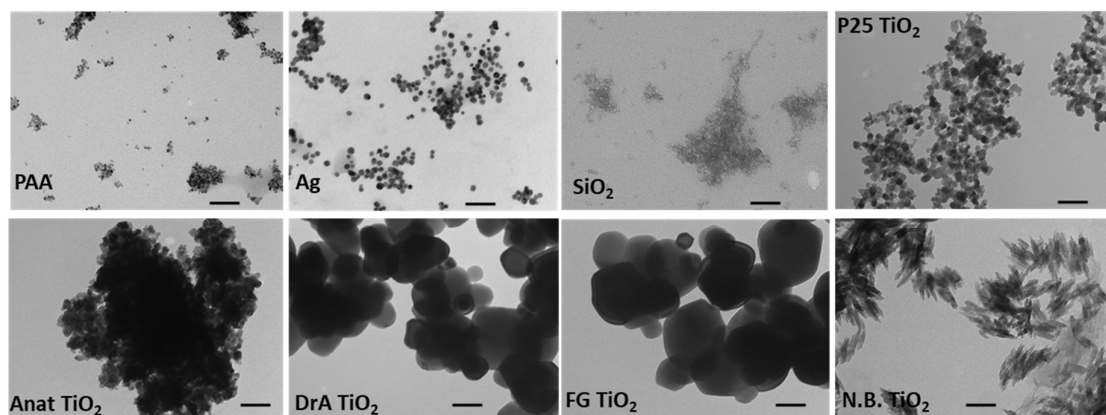

Figure S2: Transmission electron microscopy of nanoparticles dispersed in water. TEM micrographs of different NPs suspensions are shown. Scale bar: 100 nm.

Table S1: List of proteins identified by LC-ESI-MS/MS in the protein corona of the examined NPs.

| SwissProt entry name | Protein name                        | pI   | Molecular mass [Da] | Biological process                | % similarity with human ortholog |
|----------------------|-------------------------------------|------|---------------------|-----------------------------------|----------------------------------|
| A1AT                 | $\alpha$ 1-antiproteinase           | 5.98 | 43694               | proteinase inhibition             | 69/83                            |
| ALBU                 | serum albumin                       | 5,60 | 66433               | transport                         | 76/87                            |
| ANT3                 | antithrombin-III                    | 7.01 | 52347               | haemostasis                       | 87/92                            |
| APOA1                | apolipoprotein A-I                  | 5,36 | 27549               | transport                         | 78/86                            |
| APOE                 | apolipoprotein E                    | 5.55 | 35980               | cholesterol biosynthetic process  | 72/83                            |
| CFAH                 | complement factor H                 | 6.33 | 138260              | immune system                     | 62/76                            |
| FETUA                | $\alpha$ -2-HS-glycoprotein         | 5.26 | 36353               | immune system                     | 64/74                            |
| FINC                 | fibronectin                         | 5.32 | 272153              | acute-phase response              | 94/97                            |
| HBA                  | hemoglobin subunit $\alpha$         | 8.19 | 15053               | transport                         | 88/92                            |
| HBBF                 | hemoglobin fetal subunit $\beta$    | 6.51 | 15859               | transport                         | 78/89                            |
| HS90A                | heat shock protein HSP 90- $\alpha$ | 4.92 | 84731               | cellular response to heat         | 99/100                           |
| IPSP                 | plasma serine protease inhibitor    | 9,40 | 42495               | haemostasis                       | 71/84                            |
| TETN                 | tetranectin                         | 5.47 | 22144               | bone mineralization               | 85/90                            |
| THRB                 | prothrombin                         | 5.97 | 70506               | haemostasis, acute-phase response | 81/89                            |
| TSP1                 | thrombospondin-1                    | 4.74 | 129534              | behavioral response to pain       | 97/98                            |

\*The comparison of sequences between bovine and human proteins Clustal Omega multiple sequence alignment program was used.

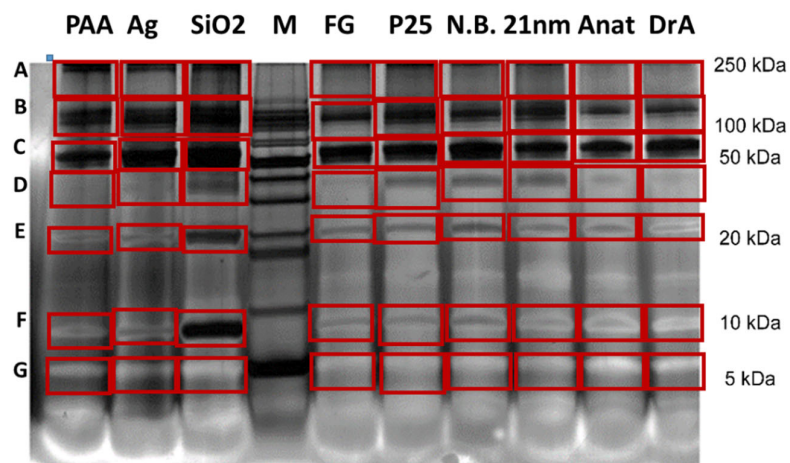

Figure S3 Analysis of NPs protein corona using SDS-PAGE of polyacrylic acid coated NPs (PAA), silver NPs (Ag), SiO<sub>2</sub>, TiO<sub>2</sub> food-grade (FG), TiO<sub>2</sub> P25 (P25), TiO<sub>2</sub> N.B. (N.B.), TiO<sub>2</sub> 21nm (21 nm), TiO<sub>2</sub> ANATAZ (Anat) and TiO<sub>2</sub> DrA NPs. Please note that additional NPs denoted as TiO<sub>2</sub> 21nm were added as a pilot test of another batch of P25 TiO<sub>2</sub>. The bands A-G (boxed red) were excised and analysed by MS (see Table S2). M denotes lanes loaded with molecular mass standards.

#### N1

| protein | NC | PAA | Silver | SiO <sub>2</sub> | TiO <sub>2</sub> P25 | TiO <sub>2</sub> ANAT | TiO <sub>2</sub> DrA | TiO <sub>2</sub> FG | TiO <sub>2</sub> NB |
|---------|----|-----|--------|------------------|----------------------|-----------------------|----------------------|---------------------|---------------------|
| A1AT    | 0  | 9   | 0      | 10               | 0                    | 1                     | 1                    | 0                   | 6                   |
| ALBU    | 17 | 340 | 145    | 153              | 121                  | 109                   | 174                  | 400                 | 96                  |
| ANT3    | 0  | 0   | 16     | 4                | 5                    | 0                     | 0                    | 0                   | 1                   |
| APOA1   | 4  | 25  | 1      | 0                | 1                    | 0                     | 9                    | 4                   | 15                  |
| APOE    | 0  | 36  | 0      | 0                | 64                   | 0                     | 0                    | 4                   | 32                  |
| CFAH    | 0  | 0   | 0      | 0                | 1                    | 0                     | 0                    | 0                   | 0                   |
| FETUA   | 1  | 49  | 25     | 20               | 9                    | 4                     | 5                    | 53                  | 24                  |
| FINC    | 0  | 0   | 0      | 0                | 0                    | 16                    | 4                    | 0                   | 0                   |
| HBA     | 1  | 4   | 1      | 0                | 1                    | 0                     | 9                    | 0                   | 1                   |
| HBBF    | 0  | 4   | 1      | 2                | 2                    | 0                     | 0                    | 0                   | 0                   |
| HS90A   | 0  | 0   | 0      | 0                | 0                    | 0                     | 0                    | 0                   | 0                   |
| IPSP    | 0  | 5   | 0      | 0                | 0                    | 0                     | 0                    | 0                   | 0                   |
| TETN    | 0  | 9   | 0      | 0                | 64                   | 0                     | 0                    | 9                   | 2                   |
| THRB    | 0  | 1   | 0      | 1                | 0                    | 0                     | 0                    | 0                   | 1                   |
| TSP1    | 0  | 4   | 0      | 0                | 0                    | 0                     | 0                    | 0                   | 0                   |

#### N2

| protein | NC | PAA | Silver | SiO2 | TiO2 P25 | TiO2 ANAT | TiO2 DrA | TiO2 FG | TiO2 NB |
|---------|----|-----|--------|------|----------|-----------|----------|---------|---------|
| A1AT    | 0  | 4   | 3      | 0    | 3        | 0         | 0        | 0       | 0       |
| ALBU    | 74 | 116 | 124    | 161  | 33       | 25        | 14       | 99      | 11      |
| ANT3    | 0  | 0   | 14     | 0    | 18       | 2         | 0        | 0       | 0       |
| APOA1   | 4  | 39  | 33     | 39   | 4        | 0         | 3        | 12      | 1       |
| APOE    | 0  | 16  | 0      | 5    | 20       | 0         | 0        | 0       | 2       |
| CFAH    | 0  | 0   | 0      | 0    | 3        | 0         | 0        | 0       | 0       |
| FETUA   | 4  | 3   | 14     | 16   | 3        | 2         | 4        | 4       | 0       |
| FINC    | 0  | 0   | 0      | 0    | 0        | 0         | 0        | 0       | 0       |
| HBA     | 0  | 0   | 0      | 0    | 0        | 2         | 0        | 0       | 0       |
| HBBF    | 0  | 18  | 5      | 0    | 0        | 2         | 0        | 0       | 0       |
| HS90A   | 0  | 0   | 0      | 0    | 0        | 0         | 0        | 0       | 0       |
| IPSP    | 0  | 0   | 0      | 0    | 0        | 0         | 0        | 0       | 0       |
| TETN    | 0  | 0   | 0      | 0    | 0        | 0         | 0        | 0       | 0       |
| THRB    | 0  | 0   | 12     | 0    | 4        | 0         | 0        | 0       | 0       |
| TSP1    | 0  | 0   | 0      | 0    | 0        | 0         | 0        | 0       | 0       |

### N3

| protein | NC  | PAA | Silver | SiO2 | TiO2 P25 | TiO2 ANAT | TiO2 DrA | TiO2 FG | TiO2 NB |
|---------|-----|-----|--------|------|----------|-----------|----------|---------|---------|
| A1AT    | 3   | 4   | 15     | 22   | 3        | 0         | 68       | 7       | 0       |
| ALBU    | 193 | 22  | 166    | 192  | 86       | 32        | 562      | 202     | 155     |
| ANT3    | 0   | 3   | 4      | 5    | 3        | 0         | 18       | 0       | 0       |
| APOA1   | 4   | 12  | 0      | 56   | 3        | 0         | 0        | 0       | 0       |
| APOE    | 0   | 0   | 0      | 14   | 4        | 0         | 0        | 4       | 0       |
| CFAH    | 0   | 0   | 0      | 0    | 0        | 0         | 0        | 0       | 0       |
| FETUA   | 16  | 0   | 14     | 4    | 4        | 6         | 18       | 5       | 16      |
| FINC    | 0   | 0   | 0      | 0    | 0        | 0         | 0        | 5       | 0       |
| HBA     | 0   | 3   | 0      | 19   | 0        | 0         | 0        | 0       | 0       |
| HBBF    | 0   | 0   | 3      | 80   | 0        | 0         | 39       | 0       | 0       |
| HS90A   | 0   | 0   | 0      | 0    | 5        | 0         | 4        | 0       | 0       |
| IPSP    | 0   | 0   | 0      | 0    | 0        | 0         | 0        | 0       | 0       |
| TETN    | 0   | 0   | 0      | 0    | 0        | 0         | 0        | 0       | 0       |
| THRB    | 0   | 0   | 0      | 3    | 0        | 0         | 0        | 0       | 0       |
| TSP1    | 0   | 0   | 0      | 0    | 4        | 0         | 39       | 0       | 0       |

Figure S4 Heatmaps of the protein abundance (spectral counts obtained from MS) in protein corona of NPs for three independent repeats (N1, N2, N3). Full names of the proteins are provided in Table S1.

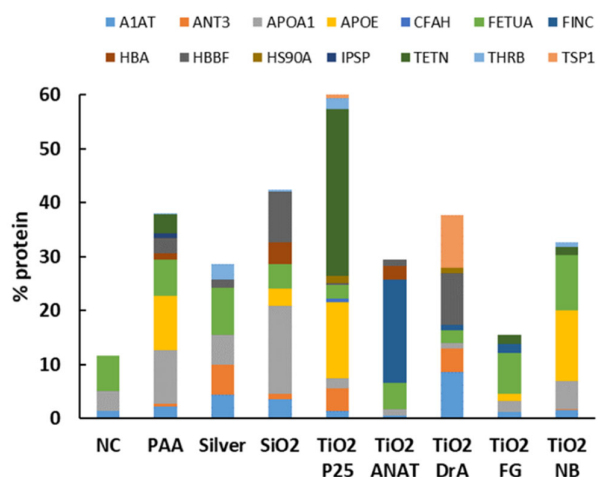

Figure S5: Relative protein abundance of proteins without albumin in the protein corona of NPs after 24h of incubation in complete cell culture medium RPMI-1640 with 10% FBS. Proteins were separated from NPs, analysed by SDS-PAGE and identified by LC-ESI-MS/MS. Spectral counts were used as a quantitative measure of the individual proteins in a sample.

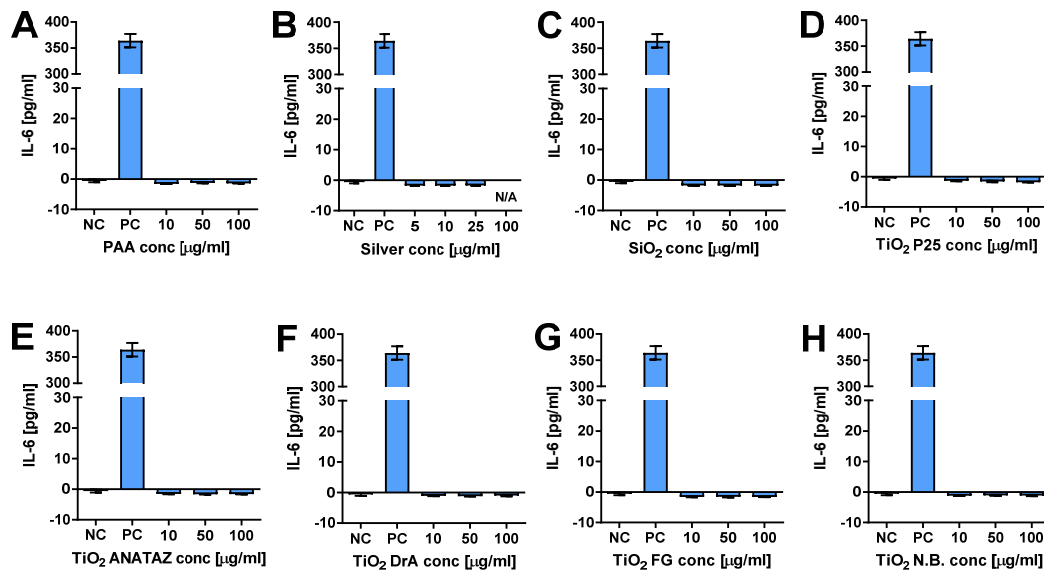

Figure S6: IL-6 secretion after 24 h incubation with increasing concentrations of (A) polyacrylic acid (PAA)-coated NPs, (B) Ag NPs, (C) industrial SiO<sub>2</sub> NPs, (D) TiO<sub>2</sub> P25 NPs, (E) TiO<sub>2</sub> ANATAZ NPs, (F) TiO<sub>2</sub> DrA NPs, (G) TiO<sub>2</sub> food-grade (FG) and (H) TiO<sub>2</sub> N.B. NPs, determined by ELISA. 1000 ng/ml LPS was used as a positive control. Shown is one of three experiments with similar results. Mean and standard error of three repeats of the same biological replicate are shown.

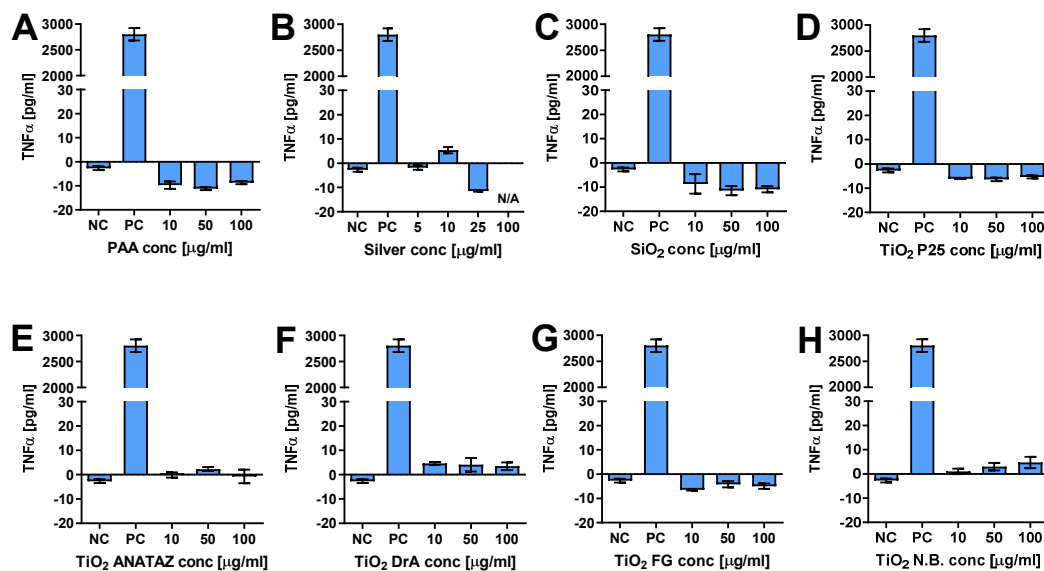

Figure S7: TNFα secretion following 24 h incubation with increasing concentration of (A) polyacrylic acid (PAA)-coated NPs, (B) silver NPs, (C) industrial SiO<sub>2</sub> NPs, (D) TiO<sub>2</sub> P25 NPs, (E) TiO<sub>2</sub> ANATAZ NPs, (F) TiO<sub>2</sub> DrA NPs, (G) TiO<sub>2</sub> food-grade (FG) and (H) TiO<sub>2</sub> N.B. NPs, determined by ELISA. 1000 ng/ml LPS was used as a positive control.

Shown is one of three experiments with similar results. Mean and standard error of three repeats of the same biological replicate are shown.

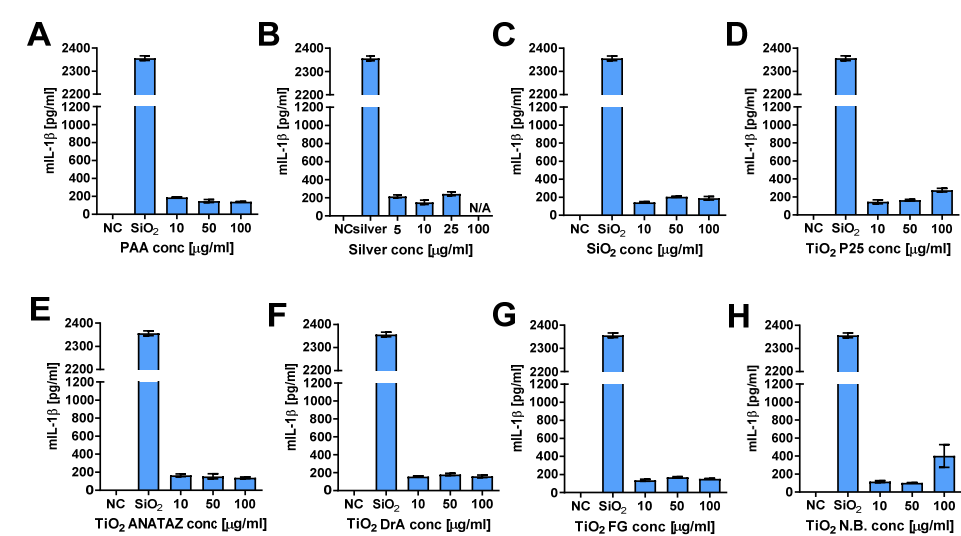

Figure S8: NP induced secretion of IL-1β in immortalized bone marrow-derived mouse macrophage cells. Cells were incubated with increasing concentration of (A) polyacrylic acid (PAA)-coated NPs, (B) silver NPs, (C) industrial SiO<sub>2</sub> NPs, (D) TiO<sub>2</sub> 21 nm NPs, (E) TiO<sub>2</sub> ANATAZ NPs, (F) TiO<sub>2</sub> DrA NPs, (G) TiO<sub>2</sub> food-grade (FG) NPs and (H) TiO<sub>2</sub> N.B. NPs, determined by ELISA. 100 μg/ml crystalline SiO<sub>2</sub> NPs was used as a positive control. Shown is one of three experiments with similar results. Mean and standard error of three repeats of the same biological replicate are shown.

Table S2: Identification of nanoparticle corona proteins separated by SDS-PAGE (Figure S3) using the ESI-MS/MS. Three independent experiments were performed. Abbreviation: m, oxidised methionine.

See supplementary file »Table S2-MS.xlsx«
